# Supplementary material for: A Phylogenetic Model for the Detection of Epistatic Interactions
Source: PubMed Central journal article supplement — Mol Biol Evol. 2013 Jun 6;30(9):2197–208. doi: 10.1093/molbev/mst108 (PMC3748351; doi:10.1093/molbev/mst108), 2013-06-06
Supplement: supp_mst108_Nasrallah_MBE_Supporting.pdf [file supp_mst108_Nasrallah_MBE_Supporting.pdf]

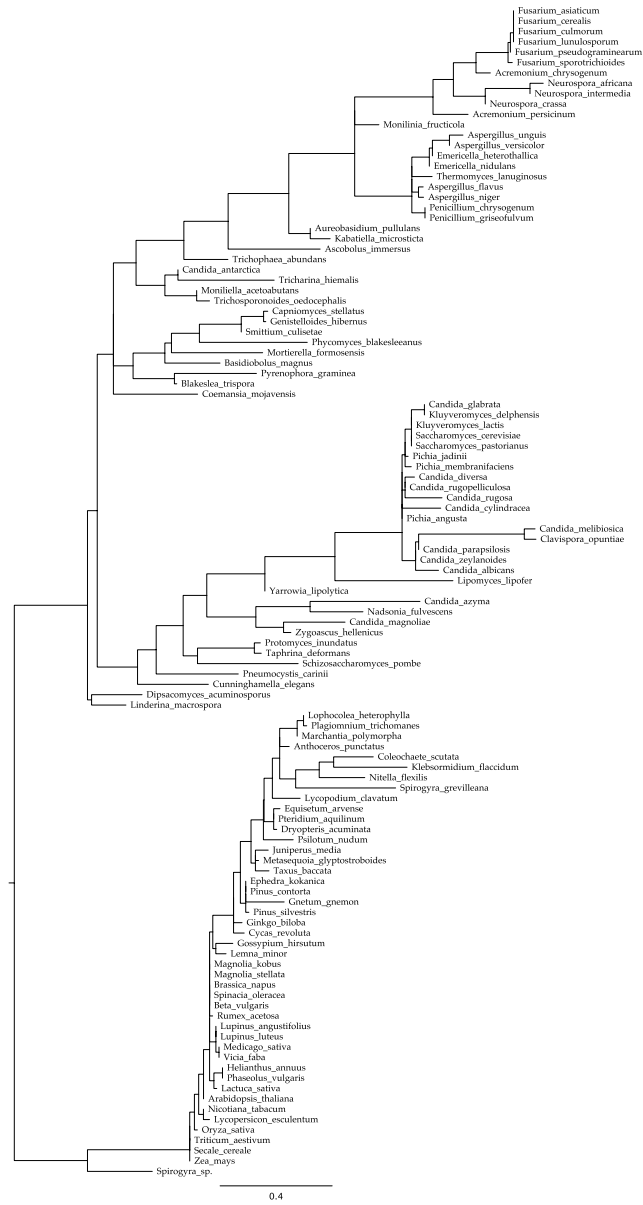

Figure S1: A maximum-likelihood tree (iML), generated using the 5S rRNA alignment under an independent sites model. The iML topology is used when conditioning upon a fixed topology.

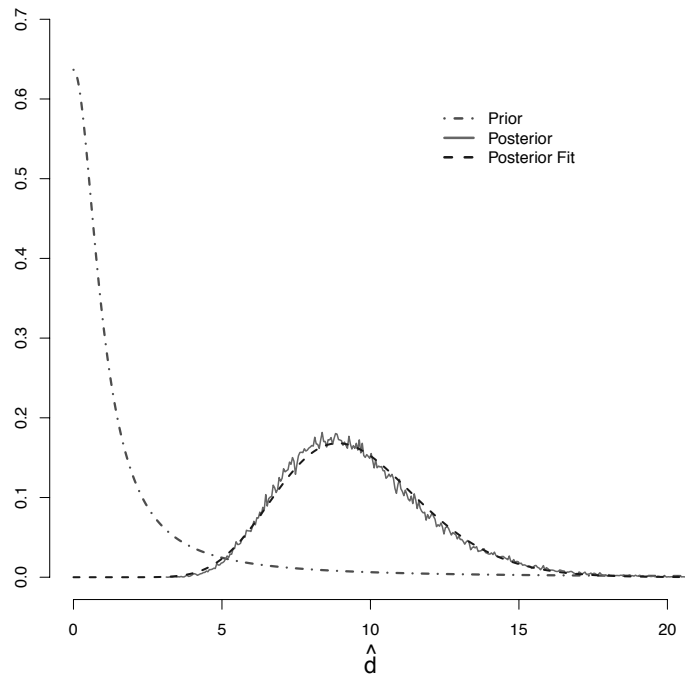

Figure S2: Savage-Dickey approach to calculating Bayes factors for nested models. The marginal posterior distribution of  $d$  (solid line) is fit to a gamma distribution (dashed line). The analytical prior density (dot-dashed line) and fitted posterior density are evaluated at  $d = 0$  to calculate the Bayes factors comparing the general model to the specific case.
